# Supplementary material for: Health programmes and services addressing the prevention and management of infectious diseases in people who inject drugs in Canada: a systematic integrative review
Source: PubMed Central journal article supplement — BMJ Open. 2021 Sep 22;11(9):e047511. doi: 10.1136/bmjopen-2020-047511 (PMC8461723; doi:10.1136/bmjopen-2020-047511), 2021-09-22
Supplement: bmjopen-2020-047511supp001.pdf [file bmjopen-2020-047511supp001.pdf]

**Full string:** infecti\*, endocarditis, hepatitis, HIV, AIDS, pneumonia, abscess, osteomyelitis, septicemia, tetanus), AND (drug use\*, drug abuse, drug misuse, injection drug, drug inject\*, IDU, IVDU, PWID, intravenous, overdose, illicit), AND (Canada, Alberta, British Columbia, BC, Manitoba, New Brunswick, Newfoundland Labrador, Nova Scotia, Ontario, Prince Edward Island, Quebec, Saskatchewan, Nunavut, Northwest Territories, Yukon

- 1) Pubmed/Medline (advanced search; full string)  
title/abstract; 10 years limit, humans, English
- 2) Cinahl (advanced search; full string)  
abstract; 10 years limit, humans, English
- 3) Web of science (basic search, full string)  
title/topic: 10 years limit, English, exclude immunology, microbiology and pharmacology
- 4) Public Health Agency of Canada.  
Search for "infection" and "who inject drugs"
- 5) Canadian Institute for Substance Use Research  
Search for 'infection' and 'who inject drugs'
- 6) Canadian Centre on Substance Use and Addiction  
After selecting resource types (publications, news, and web pages) and subject (illicit drugs), search for "infection" and "who inject drugs"
