# Supplementary material for: Health programmes and services addressing the prevention and management of infectious diseases in people who inject drugs in Canada: a systematic integrative review
Source: PubMed Central journal article supplement — BMJ Open. 2021 Sep 22;11(9):e047511. doi: 10.1136/bmjopen-2020-047511 (PMC8461723; doi:10.1136/bmjopen-2020-047511), 2021-09-22
Supplement: bmjopen-2020-047511supp003.pdf [file bmjopen-2020-047511supp003.pdf]

## SUPPLEMENTARY DATA

### Supplementary File 1

- File format: PDF
- Title of data: Full Search Strategy

### Supplementary Table 1

- File format: PDF
- Title of data: Data Extraction Form
- Description: Data extraction form including bibliographic data (author, year, journal), type of research study and design, location, site of health program or service (community, clinic, hospital, etc.), infection(s) discussed, description of health program or service, population of study within PWID, description of cohort (if part of a cohort study), purpose of study, outcomes or indicators measured, summary of findings, implications for policy, practice or research according to authors and gaps identified by authors and quality appraisal scores. Data is organized by health program or service.
